# Supplementary material for: A pentatricopeptide repeat protein acts as a site-specificity factor at multiple RNA editing sites with unrelated cis-acting elements in plastids
Source: PubMed Central journal article supplement — Nucleic Acids Res. 2012 Feb 22;40(11):5052–64. doi: 10.1093/nar/gks164 (PMC3367199; doi:10.1093/nar/gks164), 2012-02-22
Supplement: supp_gks164_nar-00877-a-2011-File008.pdf [file supp_gks164_nar-00877-a-2011-File008.pdf]

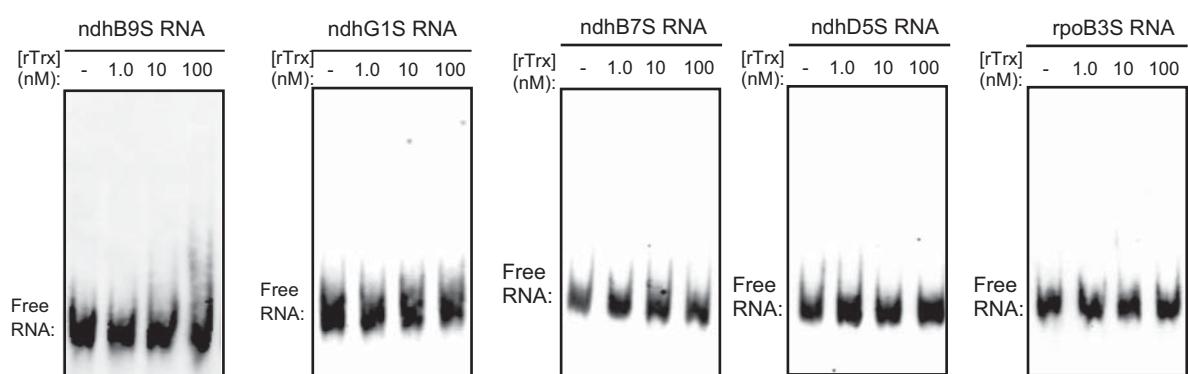

**Figure S1.** Gel mobility shift (GMS) assays were performed with the indicated concentrations of rTRX and labeled RNAs (ndhB9S, ndhG1S, ndhB7S, ndhD5S, and rpoB3S), as described in the Materials and Methods.

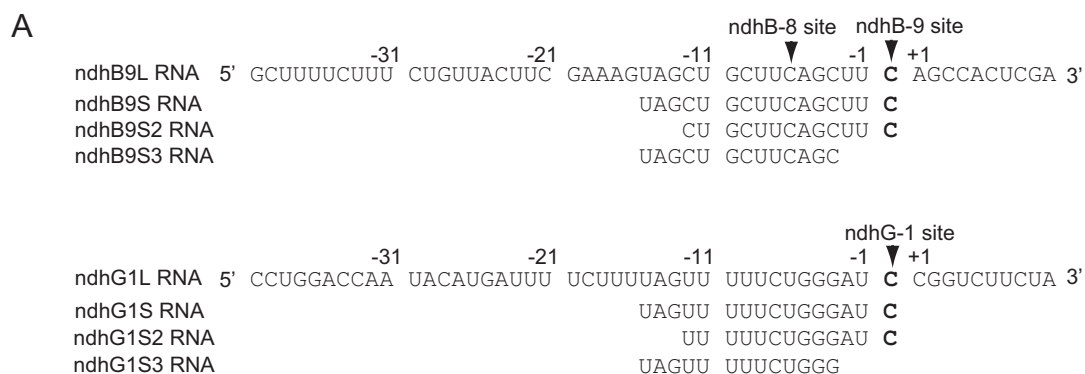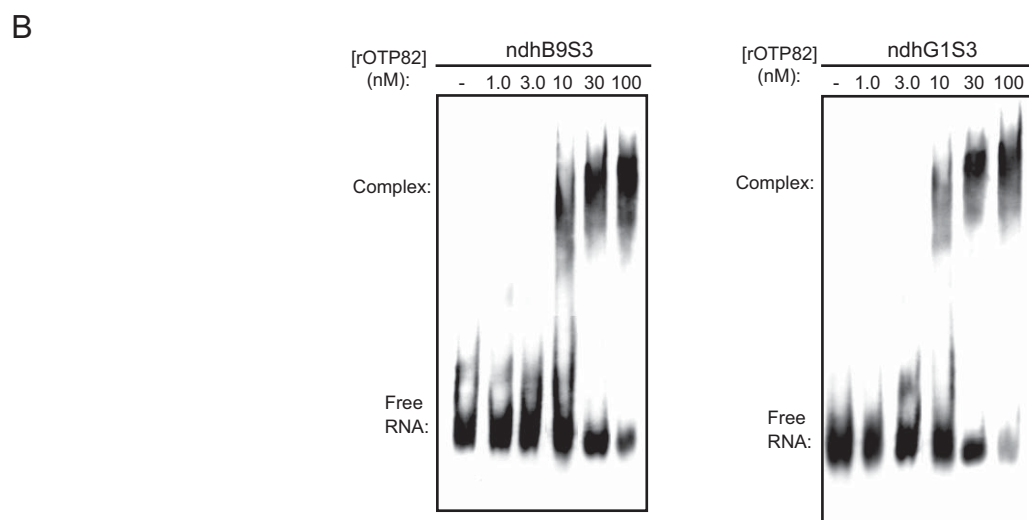

**Figure S2.** Gel mobility shift (GMS) assays with rOTP82 and target RNAs with truncations from the 3' ends. (A) The RNA sequences used as probes are shown. Editing sites of ndhB-9 and ndhG-1 are indicated in bold and are marked with arrowheads. (B) GMS assays were performed with the indicated concentrations of rOTP82 and labeled RNAs (ndhB9S3 and ndhG1S3), as described in the Materials and Methods. All of the GMS assays were performed with the same preparation of rOTP82 and within 2 weeks after purification.

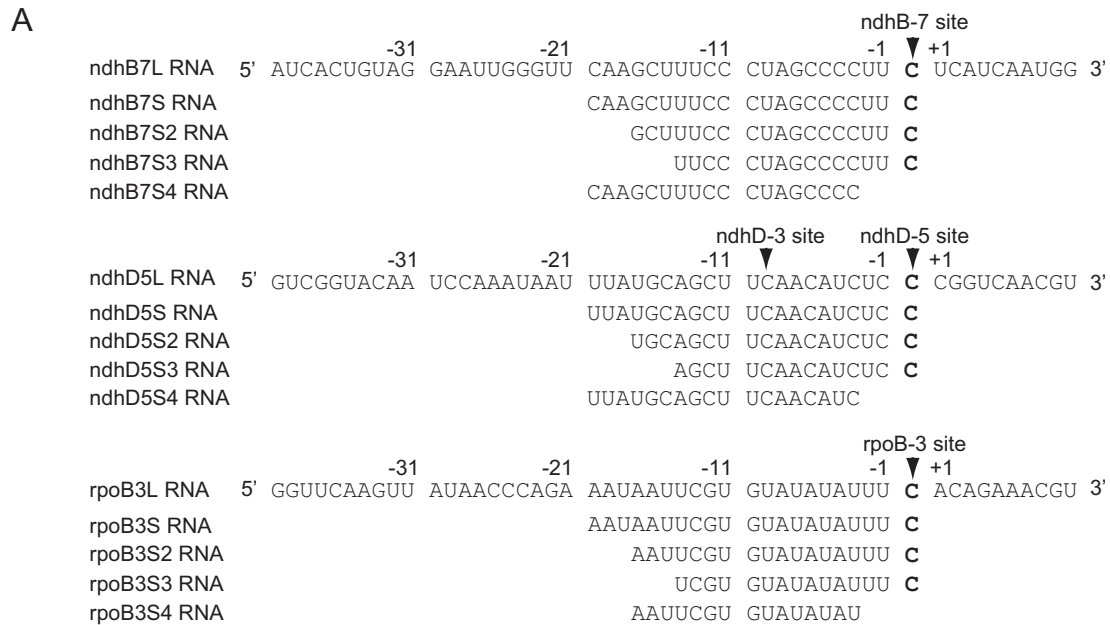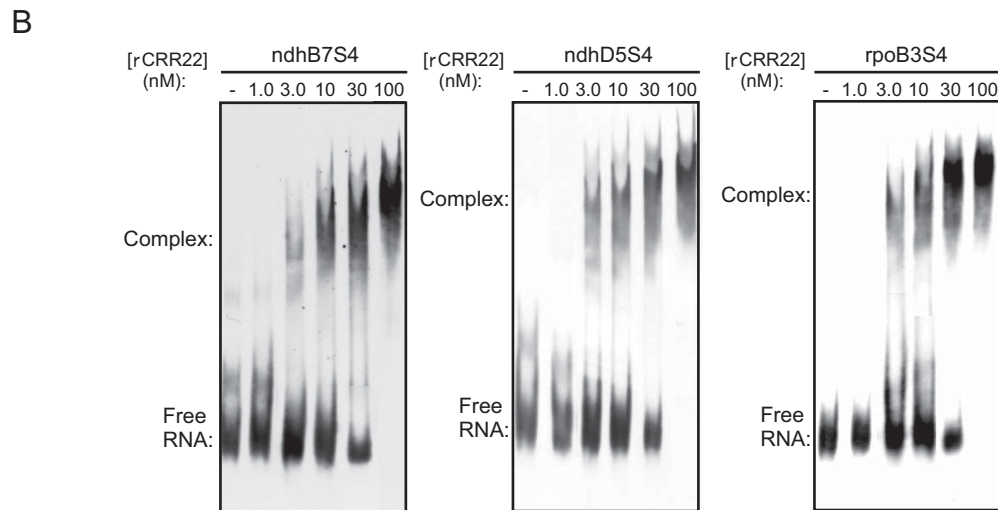

**Figure S3.** Gel mobility shift (GMS) assays with rCRR22 and target RNAs with truncations from the 3' ends. (A) The RNA sequences used as probes are shown. Editing sites of ndhB-7, ndhD-5, and rpoB3 are indicated in bold and are marked with arrowheads. (B) GMS assays were performed with the indicated concentrations of rCRR22 and labeled RNAs (ndhB7S4, ndhD5S4, and rpoB3S4), as described in the Materials and Methods. All of the GMS assays were performed with the same preparation of rCRR22 and within 2 weeks after purification.

rpoB7L RNA 5' GGUUCAAGUU AUAACCCAGA AAUAAUUCGU GUAUAUAUUU **C** ACAGAAACGU 3'

-31                 -21                 -11                   -1 ▼ +1

rpoB-7 site

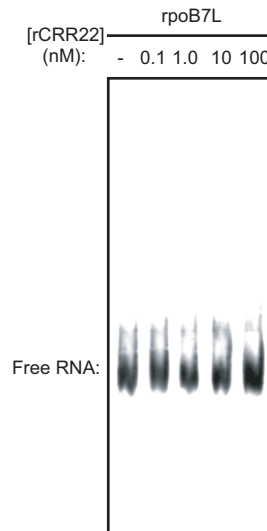

**Figure S4.** GMS assays with rCRR22 and the region surrounding the rpoB-7 site. The RNA sequence used as probe (rpoB7L) is shown. Editing sites of rpoB-7 are indicated in bold and are marked with an arrowhead. GMS assays were performed with the indicated concentrations of rCRR22 and labeled rpoB7L RNA as described in the Materials and Methods. GMS assays were performed with the same preparation of rCRR22 and within 2 weeks after purification.
